# Supplementary material
Source: publisher site journal article supplement (https://www.dovepress.com/article/390720)
Supplement: Supplementary file 1 [file get_supplementary_file.php]

**Figure S1**

**A**

control EVs

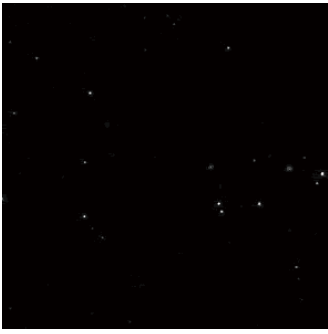

**B**

control EVs

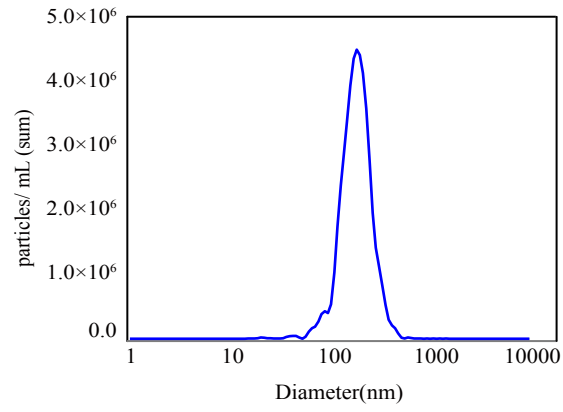

**C**

control EVs CD19 EVs

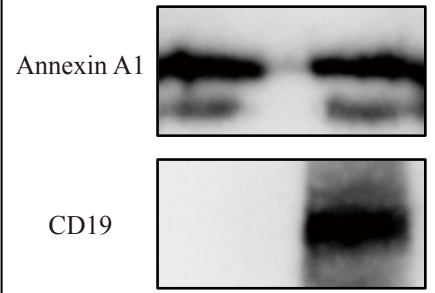

**D**

■ control EVs ■ CD19 EVs

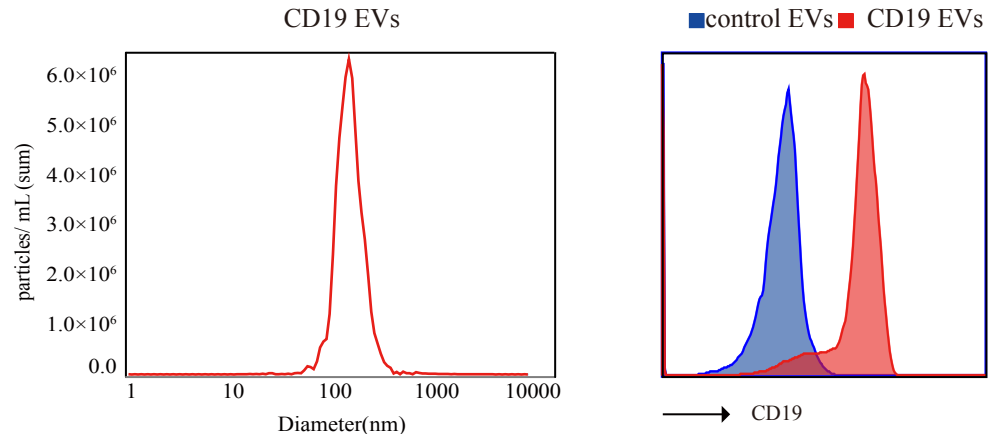

**E**

control EVs Blk

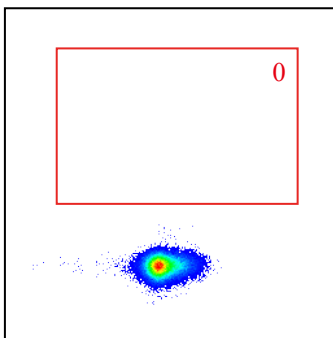

control EVs PD-L1

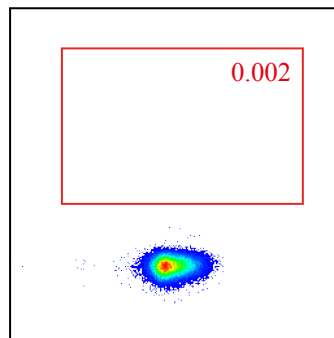

CD19 EVs PD-L1

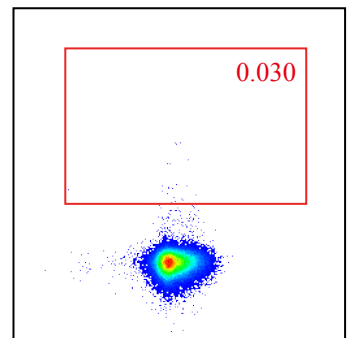

**Figure S2**

**A**

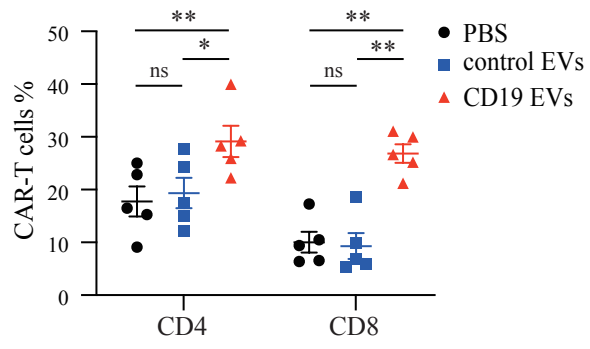

**B**

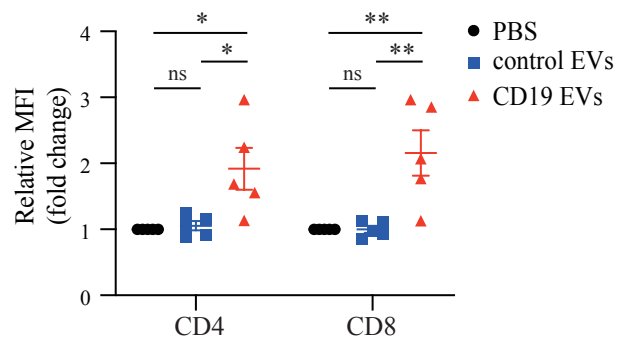

CAR high (40808)

CAR median (21134)

CAR low (12651)

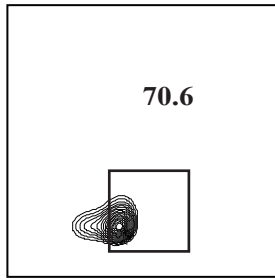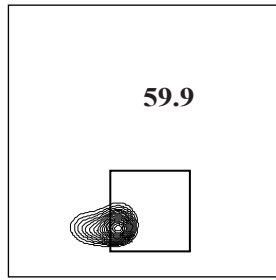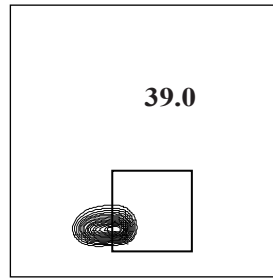

Raji WT

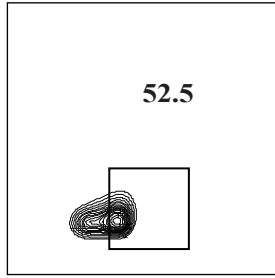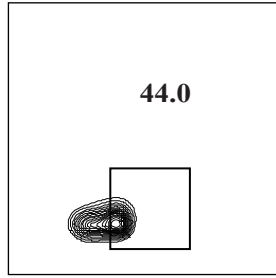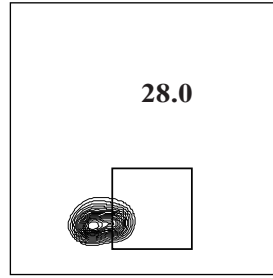

Raji Dim

SSA  
CD107A

**A**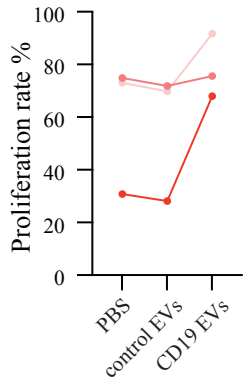**B**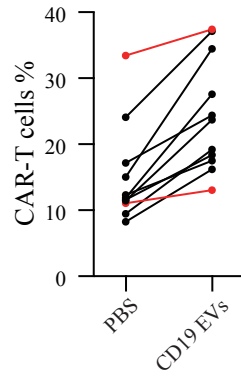**C**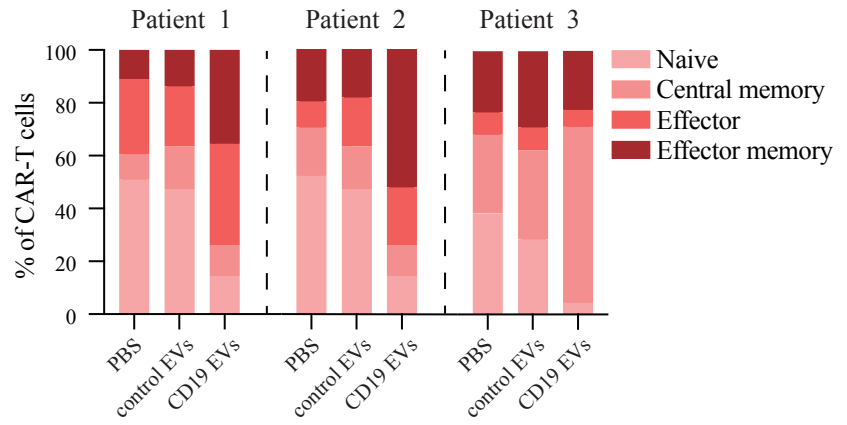

**Figure S5****A**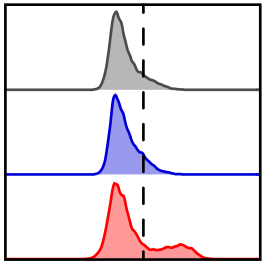

|   | Input           | CART % | CART (MFI) |
|---|-----------------|--------|------------|
| ■ | CART+PBS        | 11.0   | 31367      |
| ■ | CART+control EV | 10.5   | 28358      |
| ■ | CART+CD19 EV    | 24.8   | 94021      |

**B**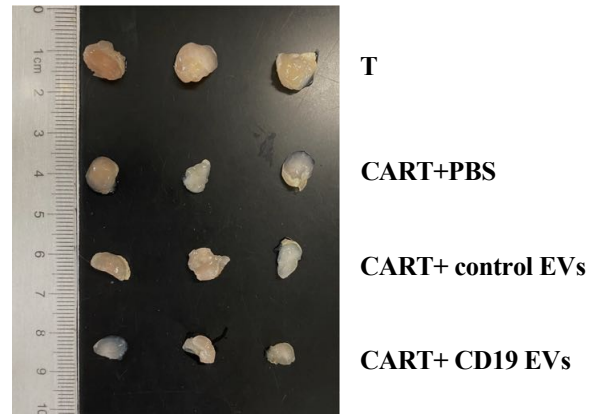**C**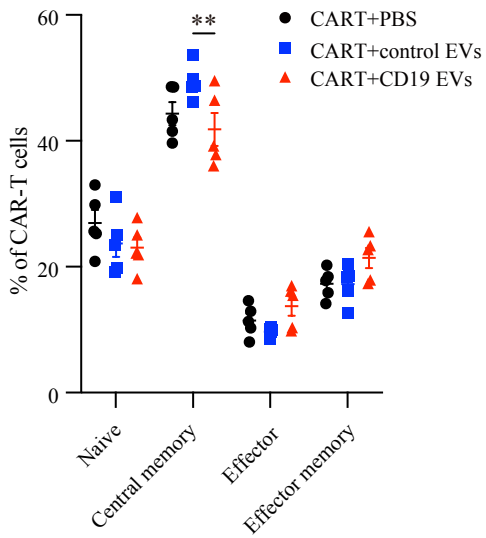**D**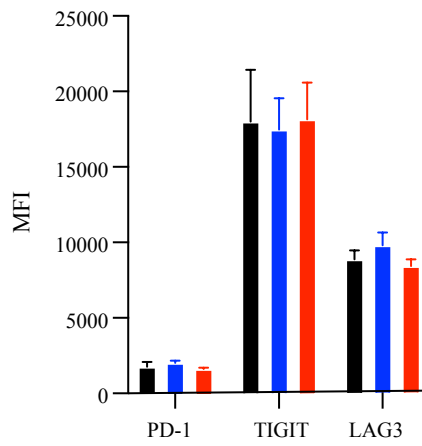**E**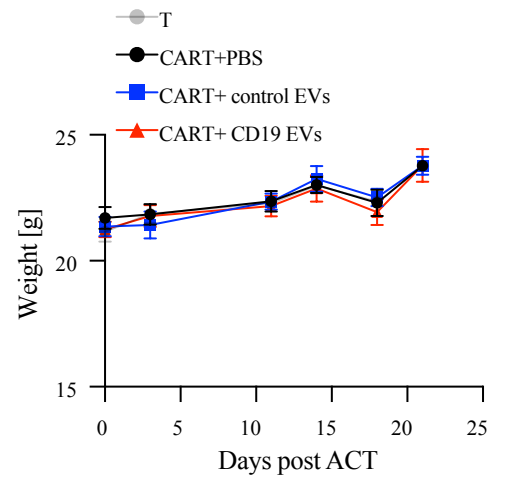

**Figure S6**

**A**

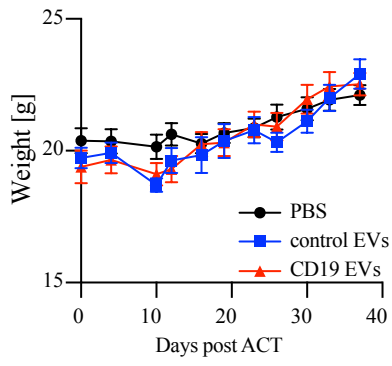

**B**

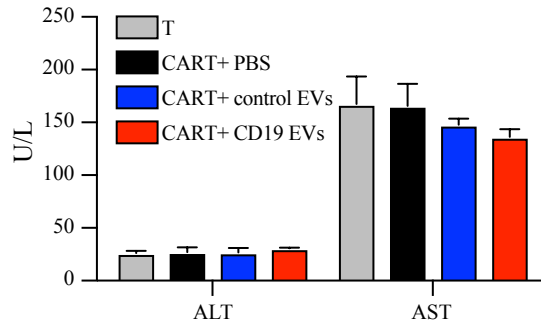

**C**

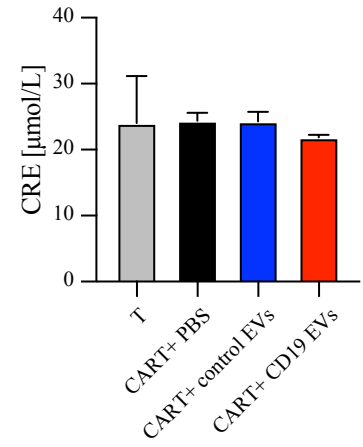

**D**

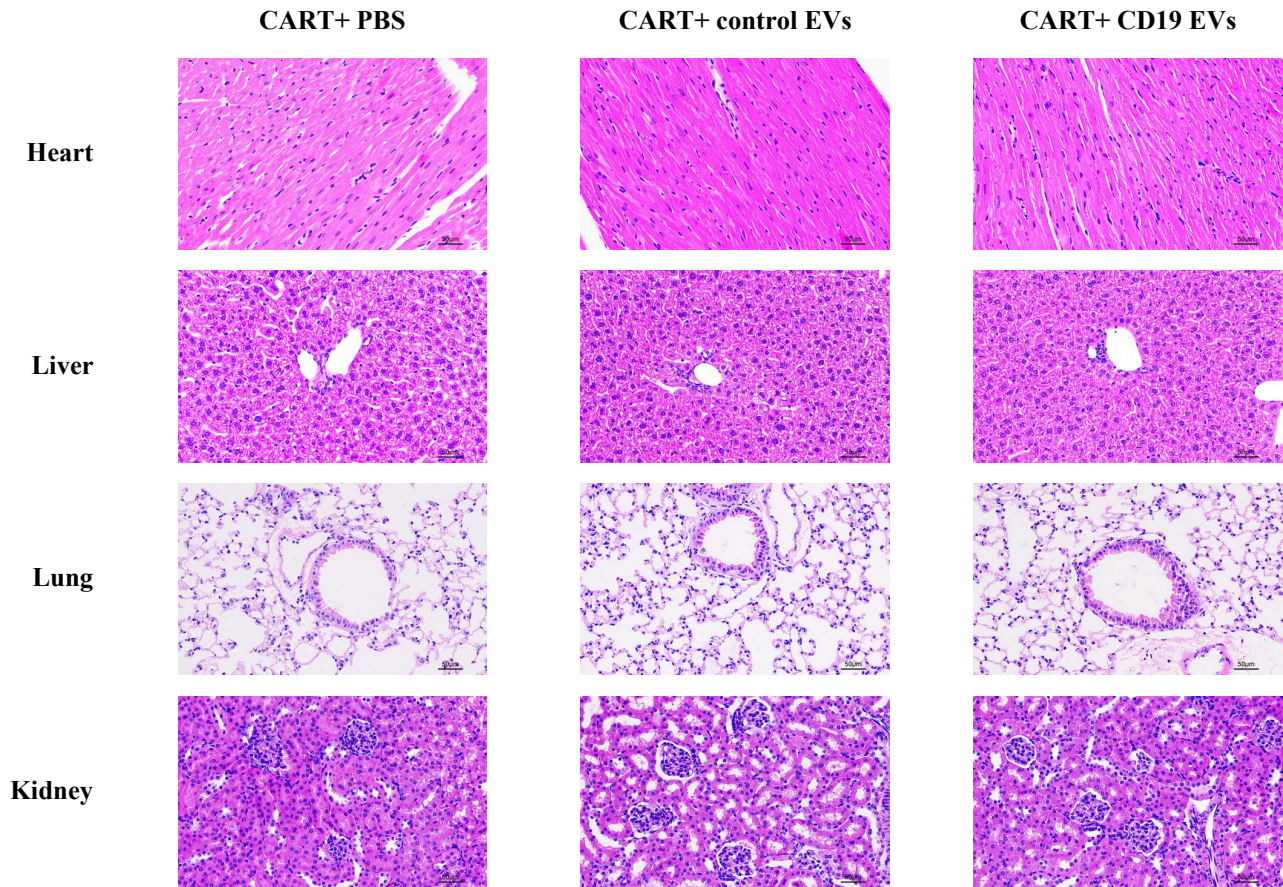

1 **Supplementary Materials**

2 **Supplementary Figure 1 Characterization of control EVs and CD19 EVs.** (A, B) NTA was used  
3 to examine the Brownian motion and size distribution of EVs. (C) Annexin A1 and CD19 expression  
4 of EVs were detected by western blotting. (D) Flow cytometry was performed to detect the  
5 expression of CD19 on the surface of EVs. (E) Flow cytometry was performed to detect the  
6 expression of PD-L1 on the surface of EVs.

7 **Supplementary Figure 2 CD19 EVs both promote the expansion and CAR expression of**  
8 **CD4+ and CD8+ CAR-T cells.** (A) Proportion and (B) CAR MFI of CD4+ and CD8+ CAR-T cells  
9 analyzed by flow cytometry after 72 h of co-culture with PBS, control EVs CD19 EVs. ns, not  
10 significant; \* $P < 0.05$ , \*\* $P < 0.01$ .

11 **Supplementary Figure 3 Antigen and CAR molecule densities regulate efficacy of CAR-T**  
12 **cells.** Flow cytometry detection of CD107a expression in CAR-T cells with varying CAR expression  
13 mixed with Raji cells with varying CD19 expression at an effector to target ratio of 1:1.

14 **Supplementary Figure 4 Effect of CD19 EVs on CAR-T cells prepared from patient-derived T**  
15 **cells.** (A) CFSE-labeled CAR-T cells were treated with PBS, control EVs and CD19 EVs  
16 respectively for 72 h, then proliferation of CAR-T cells was analyzed by flow cytometry. The three  
17 lines represent three patients. (B) Black lines represent the patients whose CAR-T cells'  
18 proliferation was promoted by CD19 EVs, red lines represent the patients did not achieve the same  
19 effect. (C) Subsets was detected using flow cytometry in CAR-T cells after 7 days treatment with  
20 PBS, control EVs, and CD19 EVs respectively.

21 **Supplementary Figure 5 CD19 EVs primed CAR-T cells exhibit enhanced anti-tumor activity**  
22 **in vivo.** (A) Flow cytometry histograms showing the CAR-T cells primed with PBS, control EVs or  
23 CD19 EVs for 72 h before ACT. (B) Photographs of tumor xenografts of tumor mice from each  
24 group on day 7 after ACT. (C, D) Subsets and immune checkpoint expression of CAR-T cells was  
25 detected by using flow cytometry on day 9 after ACT. (E) Body weight of mice treated with T cells  
26 or CAR-T cells (n = 5 animals per group). \*\* $P < 0.01$ .

27 **Supplementary Figure 6 Safety of *in vivo* administration of CD19 EVs.** (A) Body weight of mice  
28 during the time course of the various treatments. (B) Hepatic and (C) Renal function of mice

29 determined by chemistry tests. (D) representative images of H&E staining of vital organs on day 8  
30 after ACT. Scale bars, 50  $\mu$ m.
